1        **Concurrent assessment of motor unit firing properties and fascicle**  
2                    **length changes with high-density surface electromyography**  
3                                    **ultrasound-transparent electrodes**

4        Eduardo Martinez-Valdes<sup>1</sup>, \*Francesco Negro<sup>2</sup>, Alberto Botter<sup>3,4</sup>, Giacinto Luigi Cerone<sup>3,4</sup>,  
5                    Deborah Falla<sup>1</sup>, \*Patricio A Pincheira<sup>4</sup>, Glen A Lichtwark<sup>5</sup>, Andrew G Cresswell<sup>5</sup>

6  
7        <sup>1</sup> Centre of Precision Rehabilitation for Spinal Pain, School of Sport, Exercise and Rehabilitation  
8        Sciences, University of Birmingham, United Kingdom.

9        <sup>2</sup> Department of Clinical and Experimental Sciences, Università degli Studi di Brescia, Brescia,  
10        Italy.

11        <sup>3</sup> Laboratory for Engineering of the Neuromuscular System (LISiN), Department of Electronics  
12        and Telecommunication, Politecnico di Torino, Torino, Italy.

13        <sup>4</sup> PoliToBIOMed Lab, Politecnico di Torino, Turin, Italy.

14        <sup>5</sup>School of Human Movement and Nutrition Sciences, The University of Queensland, Australia

15  
16        \*Authors contributed equally

17        **Corresponding Author:**

18        Eduardo Martinez-Valdes

19        Centre of Precision Rehabilitation for Spinal Pain, School of Sport, Exercise and Rehabilitation  
20        Sciences, University of Birmingham, United Kingdom.

21        Edgbaston B15 2TT

22        e.a.martinezvaldes@bham.ac.uk

23        +44 0 121 4158187

24

25        **Acknowledgments:** This study was partially funded with the University of Birmingham

26        International Engagement Fund (BIEF) awarded to EM-V.

27

28 **ABSTRACT**

29 Previous studies assessing relationships between muscle mechanics and neural activity have  
30 concurrently assessed changes in fascicle length (FL) and neural activation with  
31 electromyography (EMG) approaches with low spatial sampling from different muscle regions.  
32 This project aimed to assess changes in FL and motor unit (MU) firing, simultaneously, on the  
33 same region of interest, with high-density EMG electrodes transparent to ultrasound (HDEMG-  
34 US). EMG signals and ultrasound images were recorded simultaneously from the tibialis anterior  
35 of 10 participants, using a silicon matrix of 32 electrodes, while performing sustained-isometric  
36 ankle-dorsiflexion contractions, at diverse joint positions (0° and 30° plantar flexion) and torques  
37 (20% and 40% of maximum). EMG signals were decomposed into individual MUs and changes in  
38 FL were assessed with a fascicle-tracking algorithm. MU firing data was converted into a  
39 cumulative spike train (CST) that was cross-correlated with dorsiflexion torque (CST-torque) and  
40 FL (CST-FL). On average, 7 (3) MUs were identified across contractions. Cross-correlations showed  
41 that CST could explain on average 60% (range: 31-85%) and 71% (range: 0.31-0.88) of the  
42 variance in FL and torque, respectively. Cross-correlation lags revealed that the delay between  
43 CST-FL (~75ms) was smaller than CST-torque (~150ms,  $p < 0.001$ ). Finally, we could observe that  
44 both delays increased by ~20ms at 30° of plantar flexion ( $p < 0.05$ ). This study is the first to  
45 demonstrate the feasibility of recording single MU activity with HDEMG-US whilst simultaneously  
46 evaluating changes in FL. The findings show a close relationship between dorsiflexion torque, FL  
47 and CST, also allowing quantification of the delay between each of these signals.

48

49

## 50 INTRODUCTION

51 One of the most fundamental issues in motor control is to understand how the nervous system  
52 interacts with muscles for the generation and control of movement. While, some answers have  
53 been obtained from separate studies in the fields of neurophysiology and biomechanics, there  
54 has been a failure to effectively integrate these two disciplines in order to provide clearer  
55 information on how neural activity is influenced by muscle mechanics and vice-versa (Enoka,  
56 2004; Tytell *et al.*, 2011). The integration of electromyography (EMG) recordings and ultrasound  
57 imaging has given important information about both the mechanisms of muscle activation and  
58 contraction, respectively (Hodges *et al.*, 2003; Brown & McGill, 2010; Barber *et al.*, 2013; Day *et*  
59 *al.*, 2013; Pincheira *et al.*, 2018). However, previous studies that have integrated these  
60 techniques have 1) utilized methods with low spatial resolution, 2) recorded ultrasound images  
61 and EMG signals from different muscle regions and 3) commonly have not employed motor unit  
62 recordings to directly assess the neural drive received by muscles. With respect to the first point,  
63 studies have employed amplitude estimates from bipolar surface EMG recordings in order to  
64 assess changes in neural activity and the resultant force produced by muscles (Suzuki *et al.*,  
65 2021). Due to many factors such as crosstalk, amplitude cancellation and underlying changes in  
66 muscle length and velocity, surface EMG amplitude is unfortunately poorly correlated with the  
67 resultant force produced by muscles and therefore cannot be used to directly understand the  
68 neural determinants of muscle contractions (Negro *et al.*, 2009; Dideriksen *et al.*, 2018;  
69 Dideriksen & Farina, 2019). Regarding the second point, it has been shown that a muscle's  
70 activity is not homogeneous (Vieira & Botter, 2021), and therefore, i.e., changes in muscle  
71 architecture and/or morphology from different regions could potentially provide results that are

72 not related from those studied on the region of interest, which poses a problem when the  
73 ultrasound probe and EMG electrodes are positioned in different sections of the muscle.  
74 Regarding the final point, motor unit recordings provide a more thorough understanding of  
75 neuromechanical determinants of movement since motor units are responsible for transforming  
76 synaptic activity into muscle contractions. However, a relatively large sample is required to be  
77 able to correlate both the neural drive received by muscles and the forces produced at the muscle  
78 or tendon, an issue which is particularly difficult with classic intramuscular recordings (Farina *et*  
79 *al.*, 2016).

80 Ultrasound translucent high-density EMG (HDEMG-US) electrodes have been developed to tackle  
81 these issues (Botter *et al.*, 2013). Such setup allows simultaneous recording of high-density EMG  
82 with ultrasound images sampled from the same region of interest. This technique has the  
83 potential to improve our understanding of the neuromechanical determinants of movement,  
84 however to-date this method has not been used to relate single motor unit discharge  
85 characteristics (e.g. blind-source separation decomposition) with dynamic fascicle movement  
86 tracked from the ultrasound images.

87 Our primary aim was to develop a framework to assess motor unit firing characteristics in relation  
88 to muscle fascicle dynamics during force development and sustained isometric contraction. To  
89 demonstrate the efficacy of using fascicle length changes to understand modulations in motor  
90 unit discharge properties, we examined the relationship between motor unit cumulative spike  
91 train (CST) and both fascicle length changes and dorsiflexion torque output of the tibialis anterior  
92 muscle. Because the fascicle shortening during isometric contraction is related to force output  
93 (due to stretch of the in-series tendon), we expect the correlation between CST and fascicle

94 shortening will be similar to that between CST and torque, but with a reduced lag due to the  
95 faster conversion of motor unit activity into contraction (compared to the conversion of motor  
96 unit activity into torque). We also examined differences in recruitment threshold when  
97 considered in terms of fascicle length or torque, as possible delays between these signals, might  
98 affect the interpretation of motor unit recruitment and de-recruitment thresholds.

99

## 100 **METHODS**

101 The study was conducted at the school of Human Movement and Nutrition Sciences of the  
102 University of Queensland, Australia. All procedures were approved by the University of  
103 Queensland ethical committee (approval number: 2019001675) and were conducted in  
104 accordance with the Declaration of Helsinki. Ten healthy young male volunteers participated in  
105 the experiments [age: mean (SD) 29 (5) years]. Exclusion criteria included any neuromuscular  
106 disorder, musculoskeletal injuries such as muscle strain as well as any current or previous history  
107 of lower limb pain/injury and age <18 or >35 years. Participants were asked to avoid any  
108 strenuous activity 24 h before the measurements.

### 109 *Task*

110 Participants were seated in a reclined position on the chair of an isokinetic dynamometer (Humac  
111 Norm, CSMi Computer Sports Medicine, Stoughton, USA). The right leg (dominant for all  
112 participants) was extended and positioned over a support with the knee flexed to 10° (with 0°  
113 representing full knee extension). The centre of rotation of the ankle joint (lateral malleoli) was  
114 aligned to the centre of rotation of the isokinetic dynamometer in order to accurately quantify  
115 ankle dorsi-flexion torque. Participants performed sustained isometric dorsiflexion contractions

116 at varying torques at short (ankle at 0° plantar flexion) and long muscle lengths (ankle at 30°  
117 plantar flexion). A study schematic describing the measurements performed during the session  
118 can be seen on **Figure 1**. The session began with the participants' performing three isometric  
119 ankle dorsiflexion maximum voluntary contractions (MVC) at each ankle angle, where each MVC  
120 was separated by 2-min of rest. The order in which the ankle was positioned (short and long  
121 tibialis anterior lengths) was randomized. Following the MVC assessment, participants were  
122 allowed to practice with visual feedback of their exerted torque (displayed on a computer  
123 monitor), by performing brief ramp-hold contractions at low torque levels (20% MVC). Then, after  
124 5 min of rest, participants performed ramp-hold contractions at 20% or 40% MVC. Participants  
125 were asked to increase their torque at a rate of 10% MVC/s and then to hold the contraction at  
126 the target level for 30 s, therefore reaching the 20% MVC target in 2 s and the 40% MVC in 4 s.  
127 Two sustained 20% MVC and two sustained 40% MVC contractions were performed.

### 128 *Electromyography*

129 Surface electromyography (EMG) signals were recorded from the tibialis anterior muscle using a  
130 high-density, 32-channel, HDEMG-US electrode grid (LiSIN, Torino, Italy) (Botter *et al.*, 2013).  
131 Each grid consists of 8 x 4 electrodes (1-mm diameter, 10-mm interelectrode distance in both  
132 directions) embedded into a layer of silicon rubber **Figure 2A**. The array was located centrally  
133 between the proximal and distal tendons of the muscle, with the columns oriented parallel to  
134 the tibia bone (Martinez-Valdes *et al.*, 2020b). Skin-electrode contact was made by inserting  
135 conductive gel (Sonogel, Bad Camberg, Germany) into the electrode cavities with a mechanical  
136 pipette (Eppendorf, Hamburg, Germany) as seen previously (Botter *et al.*, 2013). Signals were  
137 amplified and recorded using a new wireless wearable HDEMG amplifier (Cerone *et al.*, 2019)

138 **(Figure 2B)**, directly connected to the grid of electrodes, which is ideal when HDEMG  
139 measurements are combined with other methods such as ultrasound imaging. The amplifier was  
140 light and compact (16.7 g and 3.4 cm x 3 cm x 1.5 cm), and contained a 16-bit analogue-digital  
141 converter. For this experiment, data was recorded in monopolar mode at a sampling frequency  
142 of 2048 Hz, with a gain of  $192 \pm 1$  V/V and a band-pass filter with cut-off frequencies between  
143 10-500 Hz. Torque data was also sampled at 2048Hz and recorded through the auxiliary input of  
144 the HDEMG amplifier. All EMG and torque data were processed and analysed offline using  
145 MATLAB 2019b (MathWorks Inc., Natick, MA).

#### 146 *Ultrasonography*

147 Ultrasound images of tibialis anterior fascicles were captured using B-mode ultrasonography (6  
148 MHz, ~80 frames per second, 60 mm field of view) using a 128-element multi-frequency  
149 transducer (LF9-5N60-A3; Telemed, Vilnius, Lithuania) attached to a PC-based ultrasound system  
150 (ArtUs EXT-1H scanner; Telemed, Vilnius, Lithuania). A dry HDEMG-US grid (without conductive  
151 gel) was first used to find the best alignment of the probe allowing clear visualization of the  
152 muscle's fascicles when the probe is placed over the electrodes. Once the optimal position was  
153 identified, the skin was marked with an indelible pen. Then, the HDEMG-US electrode grid  
154 electrode cavities were filled with conductive gel and positioned over the tibialis anterior muscle.  
155 The flat-shaped ultrasound transducer was then placed over the electrode grid and firmly  
156 strapped over the leg using an elastic bandage to prevent any movement. An example of the  
157 setup and an ultrasound image can be seen in **Figure 2B**.

#### 158 *HDEMG and ultrasound synchronization*

159 Torque, position, HDEMG, and ultrasound data were synchronized utilising an analogue pulse  
160 sent from an AD board (Micro 1401-3, Cambridge Electronic Design, Cambridge, UK). The trigger  
161 signal was set at 80 Hz and controlled frame by frame the ultrasound recording (i.e. every time  
162 the beamformer received a pulse, one frame of ultrasound data was recorded). The same trigger  
163 signal was sent to the auxiliary input of the HDEMG device and was aligned offline with the  
164 tracked fascicle data (see next section) obtained from the ultrasound files.

#### 165 *Motor unit decomposition and fascicle length tracking*

166 The HDEMG signals were decomposed into motor unit spike trains with an extensively validated  
167 blind source separation algorithm, which provides automatic identification of the activity of  
168 multiple single motor units (Negro *et al.*, 2016). Each identified motor unit was assessed for  
169 decomposition accuracy with a validated metric (Silhouette, SIL), which represents the sensitivity  
170 of the decomposed spike train. Since the identification of motor unit activity with HDEMG-US  
171 grids is more challenging due to the lower selectivity of these grids (i.e., 32 channels and inter-  
172 electrode distance of 10 mm), an accuracy level of 0.86 SIL (86% of accuracy) was used to approve  
173 or discard any motor unit (usual threshold is set at 0.90 SIL (Negro *et al.*, 2016; Martinez-Valdes  
174 *et al.*, 2020a). Moreover, further examination of each spike train was performed, and all firings  
175 separated from the next by <33.3 ms or >200 ms were re-checked manually by an experienced  
176 operator (Afsharipour *et al.*, 2020; Cogliati *et al.*, 2020). After this procedure, the averaged SIL  
177 value increased to 0.90 (0.007).

178 Tibialis anterior fascicle length changes were tracked offline by employing custom-made  
179 software (Farris & Lichtwark, 2016) utilizing a previously validated Lucas-Kanade optical flow  
180 algorithm with affine transformation (Gillett *et al.*, 2013; Farris & Lichtwark, 2016). From each



181 trial, we selected the fascicle in which we were able to visualize ~80% of its length within the field  
182 of view. We selected a fascicle from the anterior compartment of the tibialis anterior muscle  
183 because 1) this was the region of motor unit activity that was likely covered by the HDEMG  
184 electrode and 2) our preliminary results showed that changes in fascicle length from this region  
185 are enough to explain at least 70% of the variance in the resultant torque output (see results).  
186 Changes in fascicle length were analysed according to shortening length [ $\Delta$  fascicle length (i.e.  
187 difference in fascicle length from rest to target torque (20% MVC)], in order to 1) understand the  
188 amount of fascicle shortening required to recruit a motor unit and reach the required torque  
189 level (20% MVC and 40% MVC), and 2) to be able to correlate fluctuations in fascicle length with  
190 fluctuations in motor unit discharge rate, since absolute changes in fascicle length go in an  
191 opposite direction to discharge rate (fascicle length decreases when discharge rate increases, see  
192 next section). We also estimated pennation angle as the angle between the fascicle and its  
193 insertion into the central aponeurosis (Reeves & Narici, 2003). The pennation angle was  
194 calculated when the muscle was at rest and when the torque was stable during the isometric  
195 contractions.

#### 196 *Concurrent motor unit and fascicle length analysis*

197 For sustained isometric contractions, mean discharge rate was calculated from the stable plateau  
198 torque region. Motor unit recruitment and de-recruitment thresholds were defined as the ankle  
199 dorsiflexion torques (%MVC) or fascicle shortening lengths ( $\Delta$ fascicle length, mm) at the times  
200 when the motor units began and stopped discharging action potentials, respectively. For these  
201 contractions we also tested the possibility to track the same motor units across the two different  
202 target torques and muscle lengths, with a previously proposed method based on cross-

203 correlation of 2D MUAPs (Martinez-Valdes *et al.*, 2017b). In this procedure, MUAP matches  
204 between the two correlated trials (i.e. 20% MVC-0° vs 20% MVC-30°) were visually inspected and  
205 the two identified motor units were regarded as the same when they had a cross-correlation  
206 coefficient >0.80 (Martinez-Valdes *et al.*, 2017b). Cross-correlation (time domain) analysis was  
207 also used to assess the interplay between torque, fascicle length and motor unit firing data. For  
208 this purpose, motor unit discharge times were summed to generate a cumulative spike train (CST)  
209 as done previously (Thompson *et al.*, 2018). Fascicle length signals (which were sampled at 80Hz)  
210 were interpolated to 2048Hz to match both motor unit and torque data. After these procedures,  
211 the CST, fascicle length and torque signals were low-pass filtered (4th order zero-phase  
212 Butterworth, 2Hz) and then high-pass filtered (4th order zero-phase Butterworth, 0.75Hz) as  
213 presented previously (De Luca & Erim, 1994). These filtered signals were then cross-correlated  
214 to assess similarities in their fluctuations (cross-correlation coefficient) and calculate the lags  
215 between CST vs torque, CST vs fascicle length and fascicle length vs torque. These assessments  
216 provided information on the delays generated between the neural drive and torque output,  
217 neural drive and muscle contraction and, muscle contraction and torque output.

### 218 *Statistical Analysis*

219 Results are expressed as mean and (SD). Normality of the data was assessed with the Shapiro-  
220 Wilk test and Sphericity was tested with the Mauchly test. Differences between fascicle  
221 parameters (Absolute changes in length and pennation angle) at short and long muscle lengths  
222 during rest were assessed with paired t-tests. Absolute differences in fascicle length and  
223 pennation angle during isometric contractions were assessed with a two-way repeated measures  
224 ANOVA, with factors of muscle length (0° or 30° of plantar flexion) and torque (20 or 40% MVC).

225 For motor unit/ $\Delta$ fascicle length data during isometric contractions the following statistical tests  
226 were employed: 1) two-way repeated measures ANOVA with factors of muscle length and torque  
227 to assess differences in discharge rate 2) three-way repeated measures ANOVA with factors of  
228 muscle length, torque and signal comparison (CST vs torque, fascicle length vs CST, and torque  
229 vs fascicle length) to assess differences in cross-correlation results (correlation coefficient and  
230 lag) 3) three-way repeated measures ANOVA with factors of muscle length, torque and  
231 recruitment (recruitment vs de-recruitment) to assess differences between recruitment and de-  
232 recruitment thresholds [in terms of %MVC torque and  $\Delta$ fascicle length]. All ANOVA analyses were  
233 followed by pairwise comparisons with a Student-Newman-Keuls (SNK) post hoc test when  
234 ANOVA was significant. Statistical significance was set at  $p < 0.05$ .

## 235 **RESULTS**

### 236 *Maximal torque, motor unit decomposition and tracking during isometric contractions*

237 The MVC dorsiflexion torque differed at the two ankle positions and was 25.2 (13.2) and 51.8  
238 (12.5) Nm at short ( $0^\circ$  plantarflexion) and long ( $30^\circ$  plantarflexion) muscle lengths, respectively  
239 ( $P < 0.001$ ). During the isometric contractions, an average of 7 (3), 7 (2), 7 (3) and 6 (2) motor units  
240 could be identified per participant at 20% MVC- $0^\circ$ , 20% MVC- $30^\circ$ , 40% MVC- $5^\circ$  and 40% MVC- $30^\circ$ ,  
241 respectively. A representative example with the decomposition results from one participant can  
242 be seen in **Figure 3**. In this particular example, each motor unit has a clearly distinct MUAP shape  
243 (right side of the figure) which allowed accurate identification of discharge times (left side of the  
244 figure). An average of 3 (2) motor units could be tracked successfully per participant across the  
245 two muscle lengths [2D MUAP cross-correlation coefficient 0.83 (0.03)] and 3 (1) motor units per  
246 participant across the two torque levels [2D MUAP cross-correlation coefficient 0.88 (0.05)]. A

247 representative example of the tracking procedure across the two joint angles with the HDEMG-  
 248 US grids can be seen in **Figure 4**.

249 *Relationships between fascicle length, torque and motor unit discharge rate during isometric*  
 250 *contractions*

251 Absolute fascicle lengths and pennation angles during rest and isometric contractions at the  
 252 different torque targets and joint angles are presented in **Table 1**. Overall, tibialis anterior  
 253 fascicles were longer and had smaller pennation angles at 30° of plantar flexion at rest and during  
 254 contractions ( $p < 0.001$ ). Nevertheless, fascicle lengths decreased (torque effect:  $p < 0.001$ ,  
 255  $\eta^2 = 0.78$ ) and pennation angles increased (torque effect:  $p = 0.018$ ,  $\eta^2 = 0.48$ ) similarly with  
 256 increasing torque at both 0° and 30° of plantarflexion.

257

**Table 1.** Fascicle length and pennation angles at rest and during isometric contractions at 20% and 40% MVC in short and long muscle lengths

|                               | Short (0° plantar flexion) | Long (30° plantar flexion) | P-value |
|-------------------------------|----------------------------|----------------------------|---------|
| Pennation angle (°), rest     | 15.2 (1.7)                 | 12.0 (1.7)                 | <0.001  |
| Fascicle length (mm), rest    | 60.2 (8.8)                 | 74.5 (9.1)                 | <0.001  |
| Pennation angle (°), 20% MVC  | 19.2 (3.7)                 | 16.9 (3.9)                 | 0.001#  |
| Fascicle length (mm), 20% MVC | 52.7 (7.5)                 | 66.3 (9.4)                 | <0.001* |
| Pennation angle (°), 40% MVC  | 20.8 (3.1)                 | 17.4 (4.0)                 | 0.001#  |
| Fascicle length (mm), 40% MVC | 50.8 (6.9)                 | 61.9 (7.9)                 | <0.001* |

\*Significant effect of torque ( $p < 0.001$ )

#Significant effect of torque ( $p = 0.018$ )

258 Similar to the changes in fascicle length, the tracking of individual motor units across short and  
 259 long muscle lengths revealed similar discharge rates at the different joint angles (15.3 (2.6) Hz  
 260 and 14.7 (1.4) Hz at 20% MVC in 0° of plantar flexion, and 16.7 (2.3) Hz and 17.0 (2.4) Hz at 40%

261 MVC in 30° of plantar flexion, muscle length effect:  $P=0.74$ ,  $\eta^2=0.047$ ), but increased firing  
262 frequency between the different torque levels (torque effect:  $P=0.03$ ,  $\eta^2=0.43$ ). A representative  
263 example of the concurrent assessment of changes in fascicle length, torque and CST can be seen  
264 in **Figure 5**. Briefly, after the offline identification/tracking of the fascicle (**Figure 5A**), and the  
265 identification/editing of the motor unit spike trains and subsequent conversion to CSTs, three  
266 signals were obtained: torque, fascicle length and CST. All these signals were then cross-  
267 correlated on the stable torque part of the contraction (**Figure 5B**, upper panel) in order to assess  
268 common fluctuations between torque, CST and fascicle length signals. All comparisons showed  
269 high levels of cross-correlation (CST vs torque, CST vs fascicle length and fascicle vs torque) and  
270 the lags obtained, showed the delay between: neural drive and resultant torque output (CST vs  
271 torque), neural drive and muscle contraction (CST vs fascicle length) and, muscle contraction and  
272 resultant torque output (fascicle length vs torque). The cross-correlation results for the group of  
273 participants are presented in **Table 2**. Overall, all cross-correlation coefficients were high as each  
274 of the signals could explain on average, at least 50% of the variance in resultant torque, CST and  
275 fascicle length, showing that there was a strong relationship between these variables.  
276 Nevertheless, the cross-correlation between CST vs fascicle length was significantly smaller  
277 compared to the other signal comparisons (signal comparison effect:  $P=0.007$ ,  $\eta^2=0.427$ ). Cross-  
278 correlation lags (**Figure 6**) during sustained isometric contractions at 30° of plantar flexion were  
279 larger than those at 0° plantar flexion at both torque levels in all signal comparisons (muscle  
280 length effect:  $P=0.002$ ,  $\eta^2=0.66$ ).

281

**Table 2.** Cross-correlation coefficients for comparisons between cumulative spike train (CST) vs torque, CST vs fascicle length and torque vs fascicle length during isometric contractions.

|                                  | Short length<br>20% MVC | Long Length<br>20% MVC | Short length<br>40%MVC | Long length<br>40% MVC |
|----------------------------------|-------------------------|------------------------|------------------------|------------------------|
| Steady isometric<br>contractions |                         |                        |                        |                        |
| Torque vs CST                    | 0.74 (0.65-0.88)        | 0.74 (0.62-0.85)       | 0.74 (0.63-0.85)       | 0.61 (0.31-0.78)       |
| Fascicle vs CST                  | 0.64 (0.51-0.81)        | 0.57 (0.31-0.75)       | 0.63 (0.33-0.85)       | 0.50 (0.31-0.66)       |
| Torque vs Fascicle               | 0.71 (0.40-0.88)        | 0.67 (0.33-0.89)       | 0.78 (0.33-0.93)       | 0.72 (0.50-0.91)       |

Results are expressed as mean (min-max range).

282 *Variations in fascicle length and recruitment threshold and during isometric contractions*

283 Motor unit recruitment and de-recruitment thresholds in terms of both  $\Delta$ fascicle length (mm)  
284 and torque (%MVC) are shown for a representative participant in **Figure 7A**. The figure shows  
285 that recruitment threshold torque is higher than the torque at de-recruitment, however, the  
286  $\Delta$ fascicle length at which motor units were recruited and de-recruited was similar. This was  
287 confirmed in motor units that were tracked across short and long muscle lengths as de-  
288 recruitment thresholds were consistently lower when assessed in terms of %MVC torque  
289 (recruitment-de-recruitment effect:  $P=0.029$ ,  $\eta^2=0.43$ , **Figure 7B**) but similar in terms of  $\Delta$ fascicle  
290 length (recruitment-de-recruitment effect  $P=0.805$ ,  $\eta^2=0.007$ , **Figure 7B**). In addition, although  
291 recruitment and de-recruitment thresholds increased in terms %MVC torque across 20% and 40%  
292 MVC levels (torque effect:  $P=0.001$ ,  $\eta^2=0.701$ ), motor units were recruited and de-recruited at a  
293 similar  $\Delta$ fascicle length with increasing torque (torque effect:  $P=0.731$ ,  $\eta^2=0.014$ ). Finally,  
294 recruitment-de-recruitment thresholds also increased at long muscle lengths ( $0^\circ$  plantar flexion  
295 vs  $30^\circ$  plantar flexion) when considered as %MVC torque (muscle length effect:  $P<0.001$ ,  $\eta^2=0.77$ )  
296 but not in terms of  $\Delta$ fascicle length (muscle length effect:  $P=0.389$ ,  $\eta^2=0.014$ ).

297 **DISCUSSION**

298 This is the first study showing simultaneous assessment of motor unit firing properties with  
299 changes in fascicle length, on the same region of interest, with HDEMG-US electrodes. Most  
300 importantly, these changes could be analysed at different torque levels and over a relatively large  
301 range of ankle joint motion (0° to 30° of plantar flexion). With the combination of these  
302 techniques, we identified strong relationships between fluctuations in tibialis anterior discharge  
303 rate and fascicle length, as well as fluctuations in fascicle length and the torque produced. These  
304 relationships allowed us to quantify the delays between motor unit firing activity and muscle  
305 contraction, and muscle contraction and joint torque. As we hypothesised, we were able to show  
306 that the delay between CST and fascicle length was smaller than that of CST and torque, which  
307 shows that previous measures of electromechanical delay between EMG (Cavanagh & Komi,  
308 1979) or motor unit discharge patterns (Del Vecchio *et al.*, 2018) and force/torque might not  
309 provide an adequate estimation of the conversion neural activity into contraction. In addition,  
310 we could show that the delays between the neural drive and fascicle length or the generated  
311 force/torque are larger when the muscle contracts isometrically at longer fascicle lengths (**Figure**  
312 **6**). Finally, due to the possibility to track motor units across different muscle lengths and target  
313 torques, we were also able to show that recruitment and de-recruitment thresholds are similar  
314 when considered in terms of fascicle length, meaning that motor units are recruited and de-  
315 recruited at the same relative fascicle length, regardless of the joint position or torque exerted.  
316 Taken together, the findings of the present study have enhanced our understanding of the  
317 interaction between motor unit firing and mechanisms of muscle contraction.

318 This study is the first to decompose motor unit activity from HDEMG-US grids. The findings  
319 showed that an average of 7 motor units could be accurately identified per participant during  
320 isometric contractions. The motor units identified with HDEMG-US electrodes had clear distinct  
321 MUAP shapes and show differences in activity across different regions of the electrode grid  
322 (**Figure 3**). Moreover, by employing the 2D spatial representation of MUAPs we were able to  
323 track approximately 40% of the identified motor units across torques and joint angles (**Figure 4**).  
324 We previously showed the possibility to track motor units across different force levels with  
325 HDEMG, by employing 2D MUAP “signatures” (Martinez-Valdes *et al.*, 2017b). Indeed, the  
326 advantage of HDEMG systems is that they show a large spatial representation of MUAPs, which  
327 can be used to follow the same units within and across sessions. This methodology has been  
328 successfully employed in a number of studies (Martinez-Valdes *et al.*, 2017a; Boccia *et al.*, 2019;  
329 Del Vecchio *et al.*, 2019; Murphy *et al.*, 2019). We expanded on that possibility and tracked motor  
330 units across different muscle lengths obtaining good results (average 83% of correlation between  
331 MUAPs). This shows that HDEMG-US electrodes allow the concurrent assessment of changes in  
332 motor unit discharge and fascicle length and linking those changes to motor units that can be  
333 followed across different joint angles and torque levels, enabling a more reliable assessment of  
334 neuromechanical variables. Nevertheless, it is important to mention that the number of channels  
335 of these new HDEMG-US grids was half of what has been used previously for the decomposition  
336 of HDEMG signals during voluntary contractions. For this reason, the number of identified motor  
337 units in the present study was lower than previous reports (see limitations).

338 A number of studies have shown that fluctuations in firing rate are closely related to the  
339 fluctuations in torque/force (Negro *et al.*, 2009; Del Vecchio *et al.*, 2018; Thompson *et al.*, 2018).



340 Considering this observation, we attempted to quantify the level of correlation between  
341 fluctuations in firing rate (CST), changes in fascicle length and torque, in order to first,  
342 corroborate that the information obtained from the identified motor units was linked to the  
343 fascicles of the region of interest (CST vs fascicle length correlation) and also to confirm that  
344 motor unit firings identified with HDEMG-US grids would be able to predict the torque produced  
345 via the tendon. The findings showed that all signals compared had high levels of correlation (CST  
346 explained ~70% (Negro *et al.*, 2009) and ~60% of the variance in torque and fascicle length  
347 respectively), confirming that the motor unit data obtained from HDEMG-US grids provided a  
348 good representation of the fascicle behaviour of the region of interest. The lower correlation  
349 between CST and fascicle length (**Table 2**) could be explained by a number of factors, including  
350 the subtle inaccuracies in fascicle length determination from ultrasound imaging and potential  
351 mismatches between fibres contributing to CST and the fibres in the imaging region. It is possible  
352 that the fascicle tracking code or the sampling frequency employed to obtain the images (80Hz)  
353 was not sensitive enough to detect smaller changes in fascicle length during sustained  
354 contractions. However, the sampling frequency is well above the frequency of variation in force  
355 during isometric contraction (<5Hz (Farina & Negro, 2015)) and tremor (5-13Hz, (Yavuz *et al.*,  
356 2015)). Therefore, it is more likely that limitations in imaging the muscle in single plane and the  
357 resolution of the tracking algorithm may contribute to the lower correlations. The depth at which  
358 we tracked the fascicles (superficial portion of the tibialis anterior) vs region of motor units  
359 recorded may also contribute to discrepancies in the signal correlations. However, the HDEMG-  
360 US electrodes are most likely to only detect motor unit activity of the most superficial motor units  
361 (Farina *et al.*, 2002). If we also consider that blind-source separation motor unit decomposition

362 techniques favour the identification of motor units showing the largest MUAPs and the highest  
363 spatial localization on the HDEMG grid (Holobar & Farina, 2014; Negro *et al.*, 2016), it is very likely  
364 that the motor units included in the analysis mainly represent the superficial region of tibialis  
365 anterior. Nevertheless, it is important to note that our technique provided moderate-high cross-  
366 correlations between CST and fascicle length during isometric contractions, which demonstrates  
367 feasibility of using such approach to understand the link between motor unit recruitment and  
368 muscle mechanics during actual movement.

369 One of the most interesting findings from this study was the possibility of quantifying delays  
370 between CST vs. fascicle length and fascicle length vs. torque. Cross-correlation lags revealed that  
371 the time required to shorten the fascicle (conversion of motor unit firings into contraction) was  
372 smaller than the time required to produce mechanical output (torque). This finding implies that  
373 imaging of the muscle is necessary to determine the time required to convert motor unit  
374 discharge activity into contraction. Historically, the conversion of neural activity into mechanical  
375 output has been usually assessed by calculating the time-difference between the onset of  
376 force/torque and muscle activation (also known as the electromechanical delay (Cavanagh &  
377 Komi, 1979)). This assessment, however, assumes that there is no lag between the generation of  
378 a contraction and the transmission of force to the tendon. More recent studies that have  
379 combined conventional bipolar EMG and ultrasound during voluntary contractions have found  
380 that fascicle shortening happen before force/torque is generated (Begovic *et al.*, 2014; Ling *et*  
381 *al.*, 2020), which agrees with our findings. Nevertheless, this assessment has several issues, first,  
382 the onset of muscle activation from bipolar EMG signals can be greatly influenced by the  
383 electrode's location (Hug *et al.*, 2011), second, fascicle shortening from deeper muscle regions

384 could happen before EMG activity is detected on the surface (Dieterich *et al.*, 2017) and third,  
385 the assessment can be confounded by the mechanical impedances of the measuring device  
386 (Corcos *et al.*, 1992). Thus, absolute values of electromechanical delay might not provide a  
387 reliable assessment of the mechanisms responsible for force generation and transmission  
388 (Corcos *et al.*, 1992). For these reasons, we propose that cross-correlation of signals obtained  
389 from HDEMG-US motor unit decomposition and ultrasound could provide a better estimation of  
390 these delays, as such assessment considers mechanisms responsible for contraction dynamics  
391 (i.e. fascicle length responses to firing rate modulations) rather than just assessing delay  
392 differences between signals at contraction onset. Nevertheless, it is important to mention that  
393 our proposed approach shows longer delays in comparison with classical estimations of  
394 electromechanical delay (~150ms of delay between CST and torque vs. ~50ms between EMG and  
395 torque (Begovic *et al.*, 2014)), possibly due to the time-instant in which these relationships are  
396 quantified (contraction onset vs. sustained contraction), twitch characteristics of the active  
397 motor units (Del Vecchio *et al.*, 2018) and changes in MUAP duration during the contraction.  
398 Improved HDEMG decomposition techniques allowing accurate identification of motor unit  
399 activity before contraction onset (which is not currently possible), would allow comparing the  
400 delays obtained during force development and sustained contractions, in order to assess  
401 potential differences in signal transmission in different phases of isometric contractions.

402 Another interesting result obtained from the cross-correlation lags was that both CST vs. fascicle  
403 length and fascicle length vs. torque delays increased when the muscle contracted isometrically  
404 in a lengthened position (**Figure 6**). Changes in the duration of muscle-fibre twitch force and  
405 muscle-tendon compliance at larger muscle lengths likely influenced these delays. To provide

406 support to the first observation, several studies have reported that muscle twitches are  
407 significantly larger (greater contraction and half-relaxation times) when the muscle is lengthened  
408 (Stephens *et al.*, 1975; Marsh *et al.*, 1981; Bigland-Ritchie *et al.*, 1992). Therefore, it is very likely  
409 that an increase in the overall duration of the motor unit responses at longer lengths is the reason  
410 for the more delayed muscle contraction and transmission of force to the tendon observed at  
411 the two submaximal normalized torque targets (20 and 40% MVC). In addition, changes in tendon  
412 and aponeurosis elasticity during lengthening could also reduce the amount of neural drive  
413 required to activate the muscle (Lichtwark & Wilson, 2007; Mayfield *et al.*, 2016; Raiteri *et al.*,  
414 2018) and potentially increase the delays between signals. Nevertheless, the assessment of both  
415 motor unit contractile properties and the effect of passive structural properties of the muscle on  
416 motor unit behaviour needs to be confirmed in future investigations. The assessment of these  
417 delays holds great potential in both healthy populations (i.e. aging) and patients (i.e. cerebral  
418 palsy), as they could help to quantify impairments in force transmission, when muscles have  
419 altered architecture (i.e. muscle contractures).

420 The current methodology presents multiple opportunities to assess interactions between motor  
421 unit firing rate/recruitment and changes in fascicle length, however, for this methodological  
422 report we wanted to focus on the assessment of recruitment and de-recruitment thresholds in  
423 relation to both %MVC torque and fascicle length. We selected these variables because motor  
424 unit studies typically use torque to assume changes in muscle behaviour, and delays between  
425 motor unit firing and torque due to force transmission delays (along muscle/tendon and also  
426 within dynamometer) would create offsets when comparing recruitment (torque rise) vs  
427 decruitment (torque drop). The findings from this study in these assessed variables, emphasise

428 the need of quantifying changes in motor unit activity and fascicle length simultaneously. First,  
429 we were able to observe that recruitment and de-recruitment thresholds differed when  
430 quantified as % MVC torque (recruitment threshold was higher than the de-recruitment  
431 threshold) but were similar when quantified in terms of fascicle length. To our knowledge, this is  
432 the first study showing this discrepancy. Moreover, we were able to observe that the length at  
433 which a motor unit was recruited and de-recruited was maintained across joint angles and torque  
434 levels. Fascicle shortening preceded torque generation (as expected), but fascicles returned to  
435 resting values after the dorsiflexion torque returned to 0 Nm, meaning that during the ramp-  
436 down phase of the contraction, there is a time-point where the muscle returns passively to its  
437 original length (**Figure 7**). This can explain why most previous studies show lower torque values  
438 for de-recruitment than recruitment when considered as %MVC torque or absolute torque (De  
439 Luca, 1985; Romaguere *et al.*, 1993) and emphasizes the need to quantify these thresholds in  
440 terms of fascicle length and not in terms of joint force/torque. Interestingly, similar divergences  
441 were recently reported when considering recruitment and de-recruitment in terms of joint angle  
442 or fascicle length during isometric plantarflexion contractions at varying knee-joint angles  
443 (Lauber *et al.*, 2014).

444 In this study we were able identify an average of 7 motor units across contractions, which is lower  
445 than the number of units identified with non-transparent HDEMG electrodes, where  
446 approximately 15 to 20 motor units can be identified on the tibialis anterior muscle on average  
447 per participant (Martinez-Valdes *et al.*, 2020b). These differences can be attributed to a number  
448 of factors. First, the grid of electrodes employed in the current study contained 32 electrodes vs.  
449 the 64 electrodes conventionally employed to decompose EMG signals. It has been shown that a

450 larger number of channels enhances the spatial identification of MUAPs and therefore improves  
451 the separation of the multiple motor unit sources from the HDEMG with blind-source separation  
452 methods (Farina *et al.*, 2008; Negro *et al.*, 2016). Second, the inter-electrode distance of the  
453 HDEMG-US grid (10mm) is less selective than the 64-channel grids (8mm) commonly employed  
454 to decompose motor unit activity, which can again influence the separation of MUAPs from the  
455 HDEMG. Therefore, improvements in electrode construction will likely increase the number of  
456 motor units identified with HDEMG-US. Nevertheless, it is important to mention that we were  
457 still able to explain ~70% of the of the variance in torque with the number of identified units in  
458 the present study, which is similar to the values reported in previous studies (Negro *et al.*, 2009;  
459 Del Vecchio *et al.*, 2018; Thompson *et al.*, 2018). Finally, and as mentioned previously, muscle  
460 fascicle imaging using ultrasound also has some limitations in terms of the resolution of the image  
461 and ability to track length changes, as well as the limitation of only being able to image one plane  
462 of the muscle. Improvements in ultrasound probe construction and/or the addition of another  
463 ultrasound probe in a different portion of the electrode grid would likely help to improve  
464 estimations of changes in fascicle length during isometric contractions.

465 In conclusion, this study presents, for the first time, the possibility to identify motor units and  
466 track changes in fascicle length simultaneously, on the same region of interest, with HDEMG-US  
467 electrodes. We showed that this method can be employed over a wide range of conditions, and  
468 can provide important information about the inter-relationships between neural drive, fascicle  
469 length and torque, which provides new opportunities to assess the neural and mechanical  
470 determinants of muscle contractions in both health and disease.

471

472 **REFERENCES**

- 473 Afsharipour B, Manzur N, Duchcherer J, Fenrich KF, Thompson CK, Negro F, Quinlan KA, Bennett DJ &  
474 Gorassini MA. (2020). Estimation of self-sustained activity produced by persistent inward currents  
475 using firing rate profiles of multiple motor units in humans. *J Neurophysiol* **124**, 63-85.
- 476  
477 Barber LA, Barrett RS, Gillett JG, Cresswell AG & Lichtwark GA. (2013). Neuromechanical properties of the  
478 triceps surae in young and older adults. *Exp Gerontol* **48**, 1147-1155.
- 479  
480 Begovic H, Zhou GQ, Li T, Wang Y & Zheng YP. (2014). Detection of the electromechanical delay and its  
481 components during voluntary isometric contraction of the quadriceps femoris muscle. *Front*  
482 *Physiol* **5**, 494.
- 483  
484 Bigland-Ritchie BR, Furbush FH, Gandevia SC & Thomas CK. (1992). Voluntary discharge frequencies of  
485 human motoneurons at different muscle lengths. *Muscle Nerve* **15**, 130-137.
- 486  
487 Boccia G, Martinez-Valdes E, Negro F, Rainoldi A & Falla D. (2019). Motor unit discharge rate and the  
488 estimated synaptic input to the vasti muscles is higher in open compared with closed kinetic chain  
489 exercise. *J Appl Physiol (1985)* **127**, 950-958.
- 490  
491 Botter A, Vieira TM, Loram ID, Merletti R & Hodson-Tole EF. (2013). A novel system of electrodes  
492 transparent to ultrasound for simultaneous detection of myoelectric activity and B-mode  
493 ultrasound images of skeletal muscles. *J Appl Physiol (1985)* **115**, 1203-1214.
- 494  
495 Brown SH & McGill SM. (2010). A comparison of ultrasound and electromyography measures of force and  
496 activation to examine the mechanics of abdominal wall contraction. *Clin Biomech (Bristol, Avon)*  
497 **25**, 115-123.
- 498  
499 Cavanagh PR & Komi PV. (1979). Electromechanical delay in human skeletal muscle under concentric and  
500 eccentric contractions. *Eur J Appl Physiol Occup Physiol* **42**, 159-163.
- 501  
502 Cerone GL, Botter A & Gazzoni M. (2019). A Modular, Smart, and Wearable System for High Density sEMG  
503 Detection. *IEEE Trans Biomed Eng* **66**, 3371-3380.
- 504  
505 Cogliati M, Cudicio A, Martinez-Valdes E, Tarperi C, Schena F, Orizio C & Negro F. (2020). Half marathon  
506 induces changes in central control and peripheral properties of individual motor units in master  
507 athletes. *J Electromyogr Kinesiol* **55**, 102472.
- 508  
509 Corcos DM, Gottlieb GL, Latash ML, Almeida GL & Agarwal GC. (1992). Electromechanical delay: An  
510 experimental artifact. *J Electromyogr Kinesiol* **2**, 59-68.

511

- 512 Day JT, Lichtwark GA & Cresswell AG. (2013). Tibialis anterior muscle fascicle dynamics adequately  
513 represent postural sway during standing balance. *J Appl Physiol (1985)* **115**, 1742-1750.
- 514
- 515 De Luca CJ. (1985). Control properties of motor units. *J Exp Biol* **115**, 125-136.
- 516
- 517 De Luca CJ & Erim Z. (1994). Common drive of motor units in regulation of muscle force. *Trends Neurosci*  
518 **17**, 299-305.
- 519
- 520 Del Vecchio A, Casolo A, Negro F, Scorcelletti M, Bazzucchi I, Enoka R, Felici F & Farina D. (2019). The  
521 increase in muscle force after 4 weeks of strength training is mediated by adaptations in motor  
522 unit recruitment and rate coding. *J Physiol* **597**, 1873-1887.
- 523
- 524 Del Vecchio A, Ubeda A, Sartori M, Azorin JM, Felici F & Farina D. (2018). Central nervous system  
525 modulates the neuromechanical delay in a broad range for the control of muscle force. *J Appl*  
526 *Physiol (1985)* **125**, 1404-1410.
- 527
- 528 Dideriksen JL & Farina D. (2019). Amplitude cancellation influences the association between frequency  
529 components in the neural drive to muscle and the rectified EMG signal. *PLoS Comput Biol* **15**,  
530 e1006985.
- 531
- 532 Dideriksen JL, Negro F, Falla D, Kristensen SR, Mrachacz-Kersting N & Farina D. (2018). Coherence of the  
533 Surface EMG and Common Synaptic Input to Motor Neurons. *Front Hum Neurosci* **12**, 207.
- 534
- 535 Dieterich AV, Botter A, Vieira TM, Peolsson A, Petzke F, Davey P & Falla D. (2017). Spatial variation and  
536 inconsistency between estimates of onset of muscle activation from EMG and ultrasound. *Sci Rep*  
537 **7**, 42011.
- 538
- 539 Enoka RM. (2004). Biomechanics and neuroscience: a failure to communicate. *Exerc Sport Sci Rev* **32**, 1-3.
- 540
- 541 Farina D, Cescon C & Merletti R. (2002). Influence of anatomical, physical, and detection-system  
542 parameters on surface EMG. *Biol Cybern* **86**, 445-456.
- 543
- 544 Farina D & Negro F. (2015). Common synaptic input to motor neurons, motor unit synchronization, and  
545 force control. *Exerc Sport Sci Rev* **43**, 23-33.
- 546
- 547 Farina D, Negro F, Gazzoni M & Enoka RM. (2008). Detecting the unique representation of motor-unit  
548 action potentials in the surface electromyogram. *J Neurophysiol* **100**, 1223-1233.
- 549
- 550 Farina D, Negro F, Muceli S & Enoka RM. (2016). Principles of Motor Unit Physiology Evolve With Advances  
551 in Technology. *Physiology (Bethesda)* **31**, 83-94.



552  
553 Farris DJ & Lichtwark GA. (2016). UltraTrack: Software for semi-automated tracking of muscle fascicles in  
554 sequences of B-mode ultrasound images. *Comput Methods Programs Biomed* **128**, 111-118.

555  
556 Gillett JG, Barrett RS & Lichtwark GA. (2013). Reliability and accuracy of an automated tracking algorithm  
557 to measure controlled passive and active muscle fascicle length changes from ultrasound. *Comput*  
558 *Methods Biomech Biomed Engin* **16**, 678-687.

559  
560 Hodges PW, Pengel LH, Herbert RD & Gandevia SC. (2003). Measurement of muscle contraction with  
561 ultrasound imaging. *Muscle Nerve* **27**, 682-692.

562  
563 Holobar A & Farina D. (2014). Blind source identification from the multichannel surface electromyogram.  
564 *Physiol Meas* **35**, R143-165.

565  
566 Hug F, Lacourpaille L & Nordez A. (2011). Electromechanical delay measured during a voluntary  
567 contraction should be interpreted with caution. *Muscle Nerve* **44**, 838-839.

568  
569 Lauber B, Lichtwark GA & Cresswell AG. (2014). Reciprocal activation of gastrocnemius and soleus motor  
570 units is associated with fascicle length change during knee flexion. *Physiol Rep* **2**.

571  
572 Lichtwark GA & Wilson AM. (2007). Is Achilles tendon compliance optimised for maximum muscle  
573 efficiency during locomotion? *J Biomech* **40**, 1768-1775.

574  
575 Ling YT, Ma CZ, Shea QTK & Zheng YP. (2020). Sonomechanomyography (SMMG): Mapping of Skeletal  
576 Muscle Motion Onset during Contraction Using Ultrafast Ultrasound Imaging and Multiple Motion  
577 Sensors. *Sensors (Basel)* **20**.

578  
579 Marsh E, Sale D, McComas AJ & Quinlan J. (1981). Influence of joint position on ankle dorsiflexion in  
580 humans. *J Appl Physiol Respir Environ Exerc Physiol* **51**, 160-167.

581  
582 Martinez-Valdes E, Falla D, Negro F, Mayer F & Farina D. (2017a). Differential Motor Unit Changes after  
583 Endurance or High-Intensity Interval Training. *Med Sci Sports Exerc* **49**, 1126-1136.

584  
585 Martinez-Valdes E, Negro F, Falla D, Dideriksen JL, Heckman CJ & Farina D. (2020a). Inability to increase  
586 the neural drive to muscle is associated with task failure during submaximal contractions. *J*  
587 *Neurophysiol* **124**, 1110-1121.

588  
589 Martinez-Valdes E, Negro F, Farina D & Falla D. (2020b). Divergent response of low- versus high-threshold  
590 motor units to experimental muscle pain. *J Physiol* **598**, 2093-2108.

591

- 592 Martinez-Valdes E, Negro F, Laine CM, Falla D, Mayer F & Farina D. (2017b). Tracking motor units  
593 longitudinally across experimental sessions with high-density surface electromyography. *J Physiol*  
594 **595**, 1479-1496.
- 595  
596 Mayfield DL, Cresswell AG & Lichtwark GA. (2016). Effects of series elastic compliance on muscle force  
597 summation and the rate of force rise. *J Exp Biol* **219**, 3261-3270.
- 598  
599 Murphy S, Durand M, Negro F, Farina D, Hunter S, Schmit B, Gutterman D & Hynstrom A. (2019). The  
600 Relationship Between Blood Flow and Motor Unit Firing Rates in Response to Fatiguing Exercise  
601 Post-stroke. *Front Physiol* **10**, 545.
- 602  
603 Negro F, Holobar A & Farina D. (2009). Fluctuations in isometric muscle force can be described by one  
604 linear projection of low-frequency components of motor unit discharge rates. *J Physiol* **587**, 5925-  
605 5938.
- 606  
607 Negro F, Muceli S, Castronovo AM, Holobar A & Farina D. (2016). Multi-channel intramuscular and surface  
608 EMG decomposition by convolutive blind source separation. *J Neural Eng* **13**, 026027.
- 609  
610 Pincheira PA, Hoffman BW, Cresswell AG, Carroll TJ, Brown NAT & Lichtwark GA. (2018). The repeated  
611 bout effect can occur without mechanical and neuromuscular changes after a bout of eccentric  
612 exercise. *Scand J Med Sci Sports* **28**, 2123-2134.
- 613  
614 Raiteri BJ, Cresswell AG & Lichtwark GA. (2018). Muscle-tendon length and force affect human tibialis  
615 anterior central aponeurosis stiffness in vivo. *Proc Natl Acad Sci U S A* **115**, E3097-E3105.
- 616  
617 Reeves ND & Narici MV. (2003). Behavior of human muscle fascicles during shortening and lengthening  
618 contractions in vivo. *J Appl Physiol (1985)* **95**, 1090-1096.
- 619  
620 Romaguere P, Vedel JP & Pagni S. (1993). Comparison of fluctuations of motor unit recruitment and de-  
621 recruitment thresholds in man. *Exp Brain Res* **95**, 517-522.
- 622  
623 Stephens JA, Reinking RM & Stuart DG. (1975). The motor units of cat medial gastrocnemius: electrical  
624 and mechanical properties as a function of muscle length. *J Morphol* **146**, 495-512.
- 625  
626 Suzuki R, Kanehisa H, Washino S, Watanabe H, Shinohara M & Yoshitake Y. (2021). Reconstruction of net  
627 force fluctuations from surface EMGs of multiple muscles in steady isometric plantarflexion. *Exp*  
628 *Brain Res* **239**, 601-612.
- 629  
630 Thompson CK, Negro F, Johnson MD, Holmes MR, McPherson LM, Powers RK, Farina D & Heckman CJ.  
631 (2018). Robust and accurate decoding of motoneuron behaviour and prediction of the resulting  
632 force output. *J Physiol* **596**, 2643-2659.

633

634 Tytell ED, Holmes P & Cohen AH. (2011). Spikes alone do not behavior make: why neuroscience needs  
635 biomechanics. *Curr Opin Neurobiol* **21**, 816-822.

636

637 Vieira TM & Botter A. (2021). The Accurate Assessment of Muscle Excitation Requires the Detection of  
638 Multiple Surface Electromyograms. *Exerc Sport Sci Rev* **49**, 23-34.

639

640 Yavuz US, Negro F, Falla D & Farina D. (2015). Experimental muscle pain increases variability of neural  
641 drive to muscle and decreases motor unit coherence in tremor frequency band. *J Neurophysiol*  
642 **114**, 1041-1047.

643

644

645

646

647

648

649

650

651

652

653

654

655

656

657

658

659

660 **FIGURE LEGENDS**

661 **Figure 1.** Study schematic. MVC, maximum voluntary contraction torque.

662 **Figure 2.** High-density surface electromyography (HDEMG) ultrasound-transparent electrodes.

663 A) Back (up) and front (down) of the 32-channel (10 mm inter-electrode distance) electrode grid.

664 B) HDEMG electrode grid with 32-channel HDEMG amplifier (connected on top of the electrode)

665 and flat ultrasound probe can be seen on the left. Ultrasound image of proximal tibialis anterior

666 muscle can be seen on the right. Note the quality of the image with accurate visualization of

667 fascicles and, superficial, intermediate and deep aponeuroses.

668 **Figure 3.** Motor unit identification during isometric contractions. A total of 11 motor units (MUs)

669 were decomposed from the HDEMG signals in a representative participant during an isometric

670 contraction at 20% of the maximum voluntary torque (0° of plantarflexion). Instantaneous firing

671 rate with torque profile can be seen on the left of the figure while 2D motor unit action potentials

672 (MUAPs) from each of these motor units can be seen on the right of the figure. Note the clear

673 differences in MUAP shape for each of the identified units.

674 **Figure 4.** Motor unit tracking. A representative example of a motor unit that was tracked across

675 two-plantarflexion angles at 20% MVC can be seen on the figure. For this motor unit, the action

676 potentials (top of the figure) had a cross correlation coefficient of 0.91 across angles. The

677 instantaneous firing rate of this unit can be seen on the bottom of the figure.

678 **Figure 5.** Fascicle length tracking procedure and correlation with torque and motor unit data. A)

679 A tibialis anterior ultrasound image and a fascicle of interest (red) can be seen on top of the

680 figure. The length data obtained from the tracking of this fascicle was then correlated with torque

681 and cumulative spike train (CST) signals (bottom). Fascicle length data is presented as the amount

682 of shortening from rest to target torque (fascicle length during rest-fascicle length reached at  
683 target torque). Note that fascicle shortening precedes the generation of torque during the ramp-  
684 up phase of the contraction and then returns to baseline values after the torque signal returns  
685 to zero. B) Common fluctuations from the three generated signals (torque, CST and fascicle  
686 length) in the steady-torque part of the contraction can be seen on top of the figure. Cross-  
687 correlation and lag (delay, ms) results between CST vs torque, CST vs fascicle length (fascicle) and  
688 fascicle vs torque can be seen on the bottom of the figure.

689 **Figure 6.** Cross-correlation lag (delay) results during isometric contractions. Delays between  
690 cumulative spike train (CST) vs torque, CST vs fascicle length (fascicle) and fascicle vs torque can  
691 be seen for sustained isometric contractions at 0° and 30° of plantarflexion at 20% MVC (A) and  
692 40% MVC (B). \*, significant effect of joint angle ( $p < 0.05$ ).

693 **Figure 7.** Recruitment and de-recruitment thresholds in relation to torque and fascicle length. A  
694 representative example of recruitment and de-recruitment threshold of a motor unit in relation  
695 to torque and fascicle length can be seen on the left of the figure. The recruitment threshold for  
696 this unit was higher than the de-recruitment threshold when calculated as %MVC torque (green  
697 dashed line) but similar when calculated as fascicle shortening length (blue dashed line). Fascicle  
698 length data is presented as the amount of shortening from rest to target torque (fascicle length  
699 during rest-fascicle length reached at target torque). The same results can be appreciated by the  
700 group of participants on the right of the figure as recruitment thresholds are consistently higher  
701 than de-recruitment thresholds across target torques and angles when considered as %MVC  
702 torque (upper right) but similar when calculated from fascicle length data (lower right). \*,

703 significant effect of recruitment-de-recruitment ( $p < 0.05$ ). #, significant effect of joint angle

704 ( $p < 0.05$ ).  $\Psi$ , significant effect of torque ( $p < 0.05$ ).

705

706

707

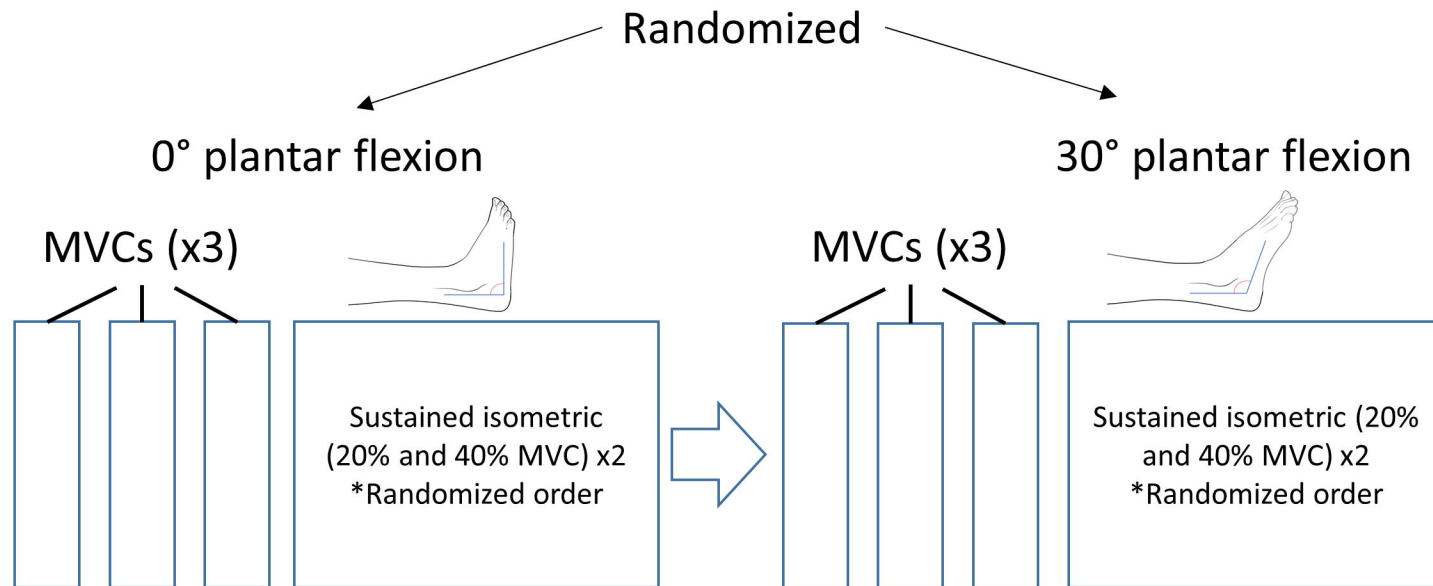

A)

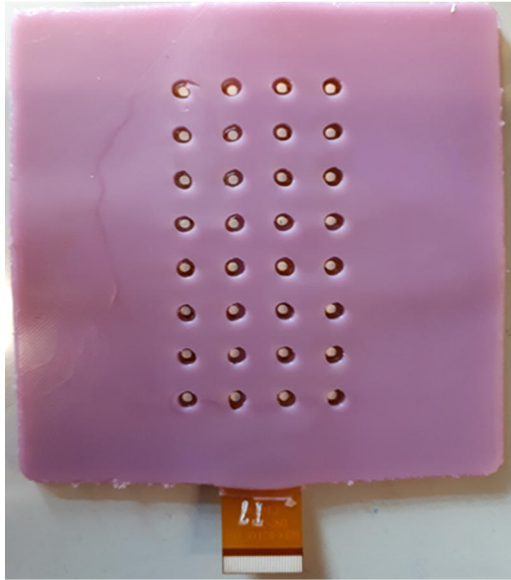

B)

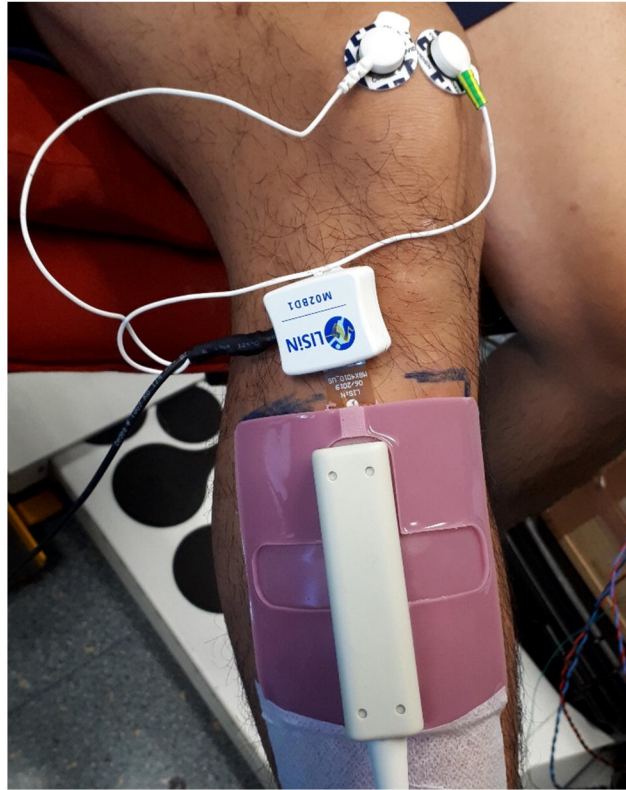

Distal

Proximal

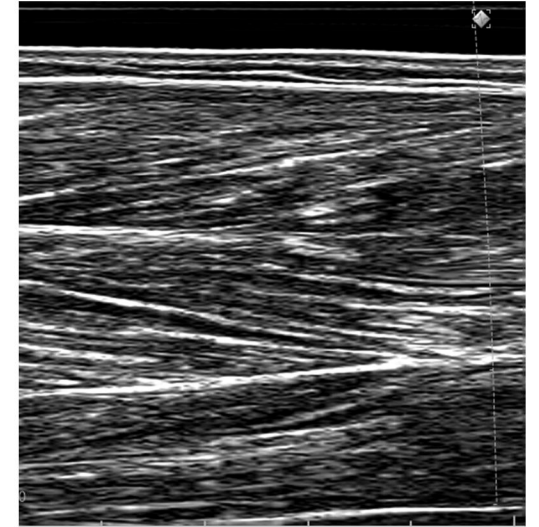





**Cross correlation = 0.91**

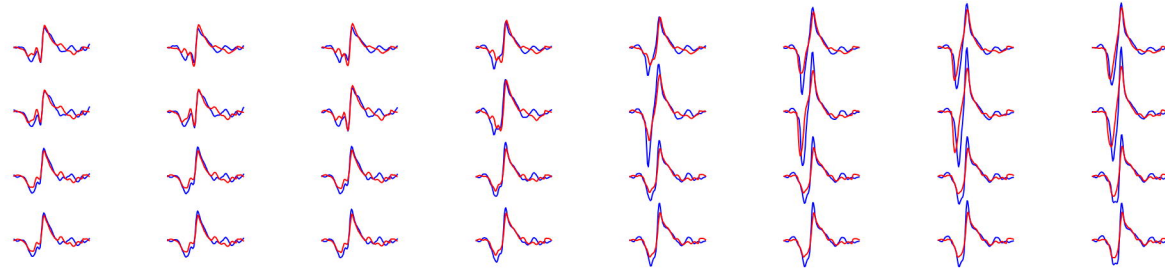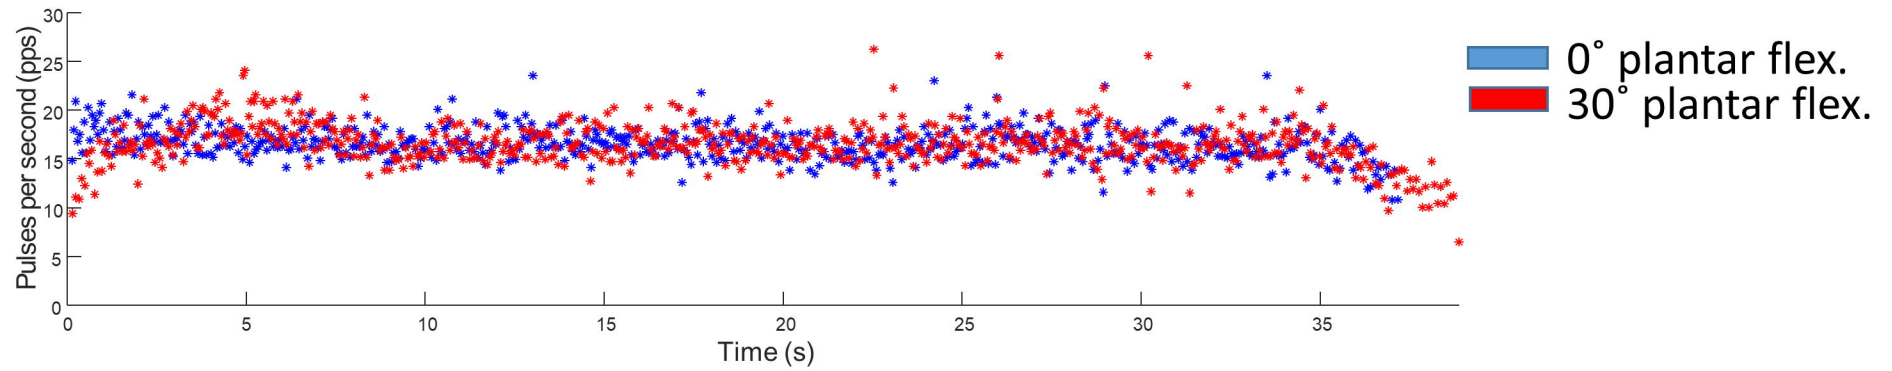

A)

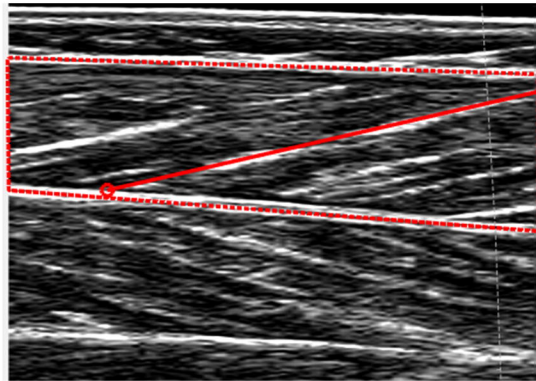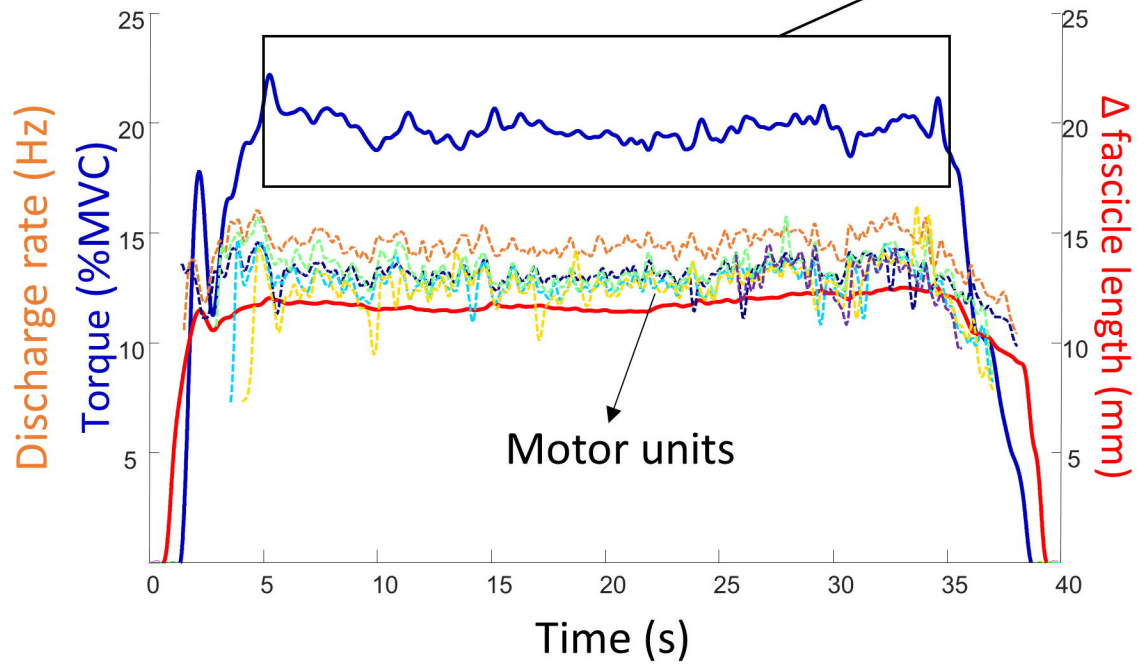

B)

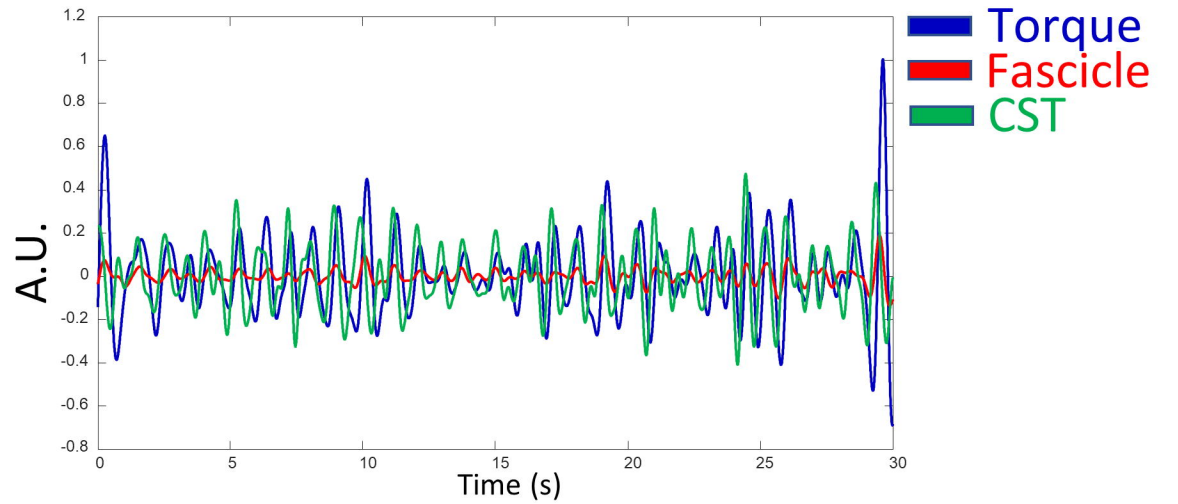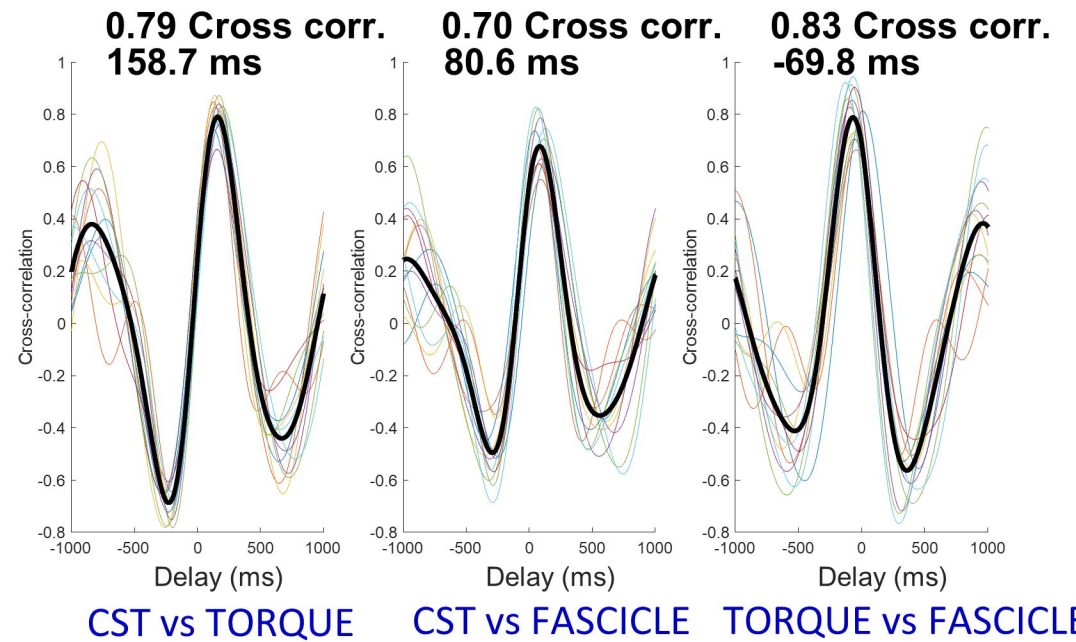

A) Cross-correlation lag 20% MVC

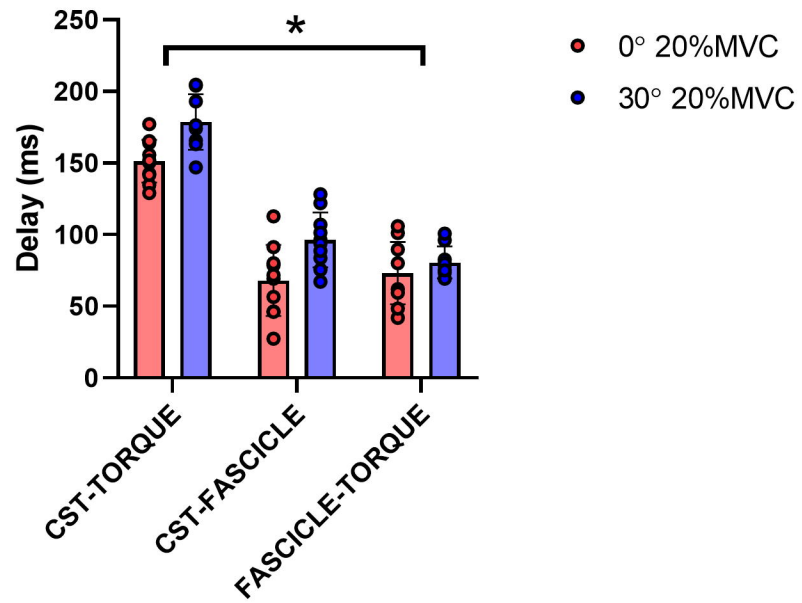

B) Cross-correlation lag 40% MVC

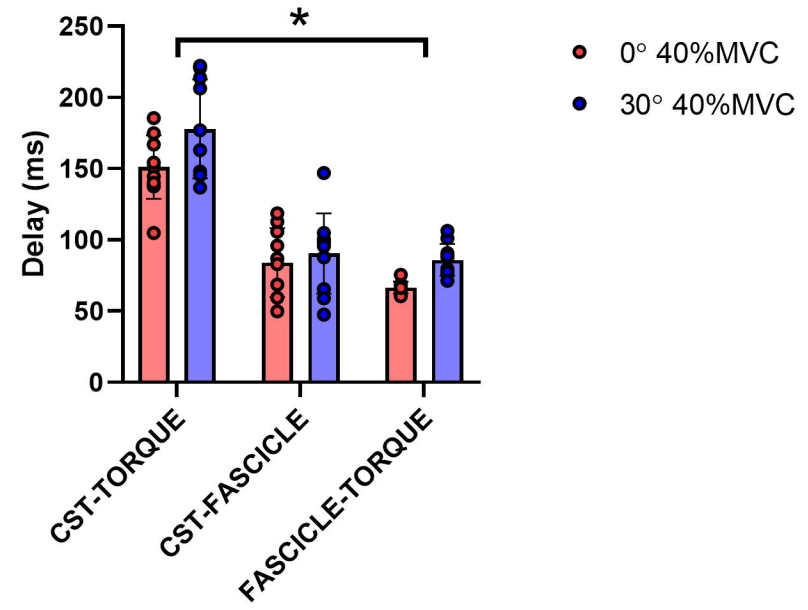

A)

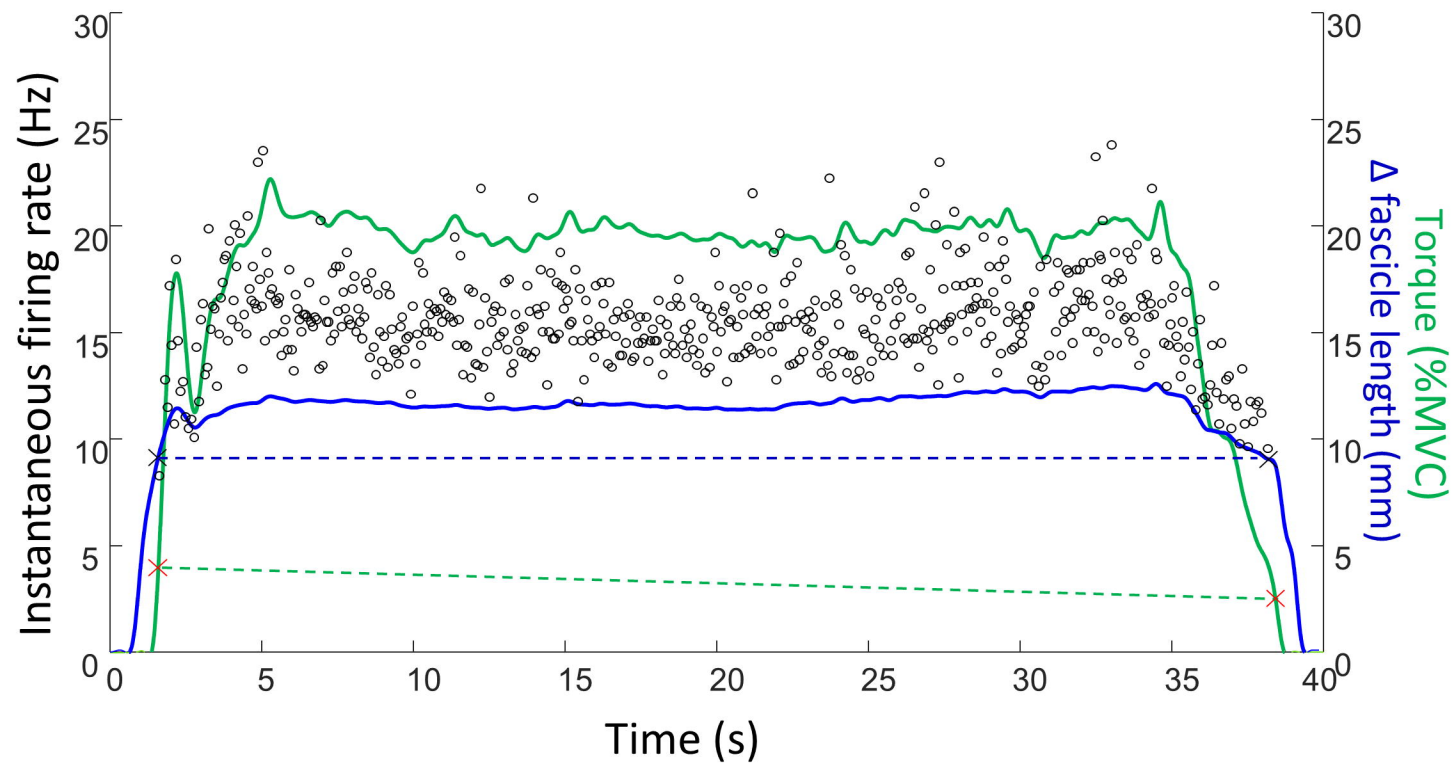

B)

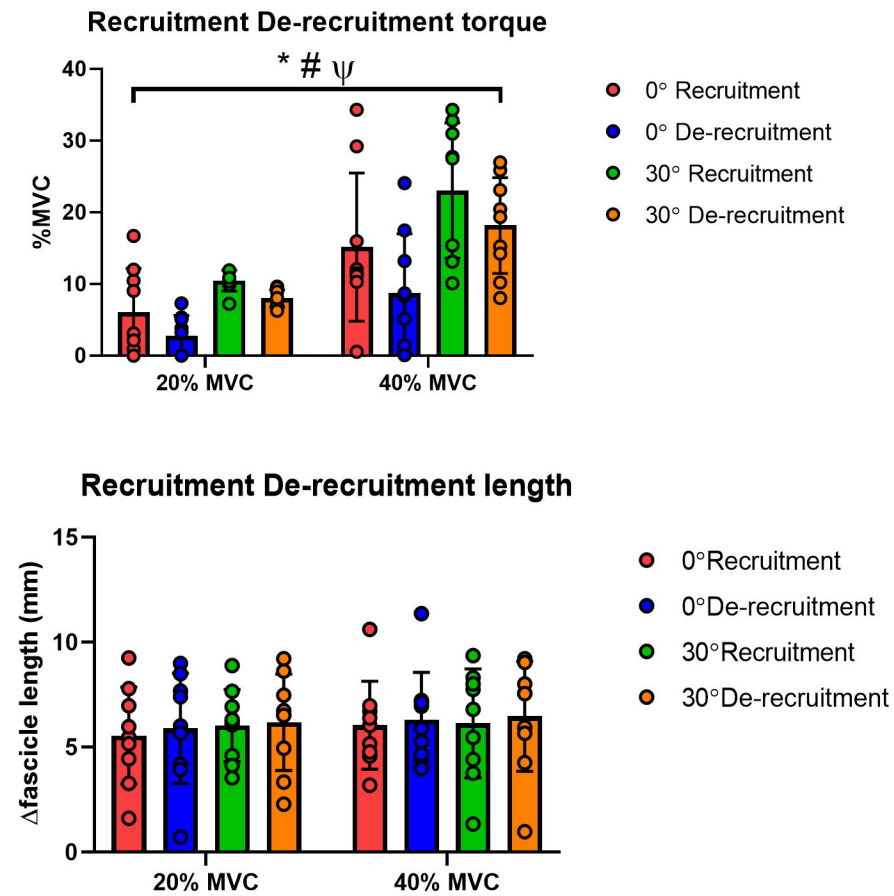

Source: http://biorxiv.org/content/10.1101/2021.04.27.441619v1.full.pdf
